# Supplementary material for: Cyclic CO2 absorption/desorption property of Li3NaSiO4 under the partial pressure of CO2 for practical applications
Source: Royal Society of Chemistry journal article supplement (doi:10.1039/d4dt00212a), 2024-01-01
Supplement: d4dt00212a1.pdf [file d4dt00212a1.pdf]

## Electronic supplementary information (ESI)

### Cyclic CO<sub>2</sub> absorption/desorption property of Li<sub>3</sub>NaSiO<sub>4</sub> under the partial pressure of CO<sub>2</sub> for practical applications

Shumpei Iwasaki,<sup>a</sup> Kosuke Shido<sup>a</sup>, Fumito Fujishiro,<sup>b</sup> and Takuya Hashimoto<sup>a\*</sup>

<sup>a</sup> Department of Physics, College of Humanities and Sciences, Nihon University, Setagaya-ku, Tokyo 156-8550, Japan

<sup>b</sup> Faculty of Science and Technology, Kochi University, Kochi-shi, Kochi 780-8520 Japan

XRD measurements of prepared Li<sub>3</sub>NaSiO<sub>4</sub> were performed right before the other characterizations. Because the small peaks assigned as Li<sub>2</sub>SiO<sub>3</sub> were observed in addition to the main peaks identified as Li<sub>3</sub>NaSiO<sub>4</sub>, Rietveld analysis was conducted assuming the coexistence of the two phases. Fig. S1 shows the results of the Rietveld analysis of the X-ray diffraction (XRD) patterns of Li<sub>3</sub>NaSiO<sub>4</sub> used in this study. The Bragg angles of Li<sub>3</sub>NaSiO<sub>4</sub> and Li<sub>2</sub>SiO<sub>3</sub> are represented by green and pink bars, respectively. The blue curve represents the difference in the experimentally obtained data (●) and calculated data (red curve). The obtained parameters are listed in Tab. S1.

The calculated weight ratio of Li<sub>3</sub>NaSiO<sub>4</sub>/Li<sub>2</sub>SiO<sub>3</sub> was 0.9842/0.0158. The purity of Li<sub>3</sub>NaSiO<sub>4</sub>, calculated by assuming that the same molar of LiNaCO<sub>3</sub> with Li<sub>2</sub>SiO<sub>3</sub> was present owing to an incomplete reaction, was 96.9 wt%.

---

\* Corresponding author: Department of Physics, College of Humanities and Sciences, Nihon University, 3-25-40 Sakurajousui, Setagaya-ku, Tokyo 156-8550, Japan  
E-mail address: hashimoto.takuya@nihon-u.ac.jp (Takuya Hashimoto)

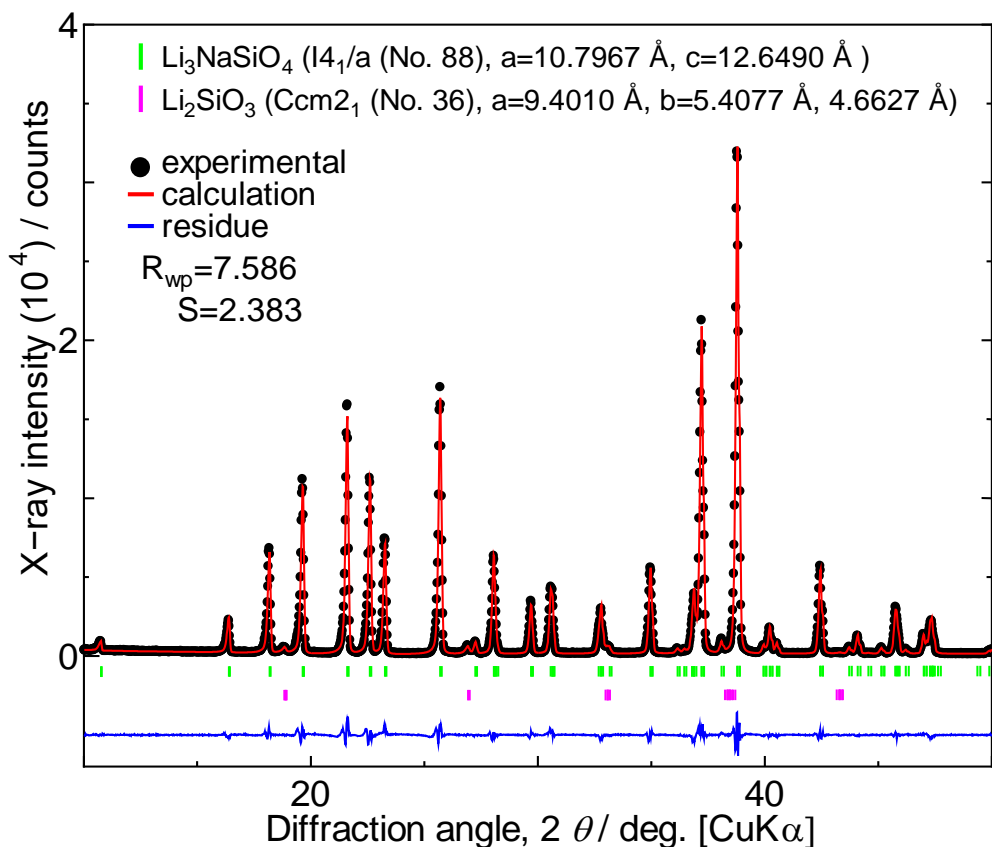

Fig. S1 Results of the Rietveld analysis of X-ray diffraction pattern of  $\text{Li}_3\text{NaSiO}_4$  used in this study.

Tab. S1 Parameters obtained from the Rietveld analysis.

| phase                       | atom | Wyckoff position | occupancy | x      | y        | z        | B       |
|-----------------------------|------|------------------|-----------|--------|----------|----------|---------|
| $\text{Li}_3\text{NaSiO}_4$ | Si   | 16 f             | 1.0       | 0.4626 | 0.06681  | 0.1945   | 1.159   |
|                             | Na   | 16 f             | 1.0       | 0.2791 | 0.01566  | 0.5952   | 1.500*  |
|                             | Li1  | 16 f             | 1.0       | 0.1579 | 0.7198   | 0.8159   | 0.3161  |
|                             | Li2  | 16 f             | 1.0       | 0.1624 | 0.2355   | 0.6933   | 0.4097  |
|                             | Li3  | 16 f             | 1.0       | 0.1322 | -0.2511  | 0.5696   | 0.1000* |
|                             | O1   | 16 f             | 1.0       | 0.4516 | -0.07604 | 0.7021   | 0.5000* |
|                             | O2   | 16 f             | 1.0       | 0.3516 | 0.2126   | 0.6649   | 0.5000* |
|                             | O3   | 16 f             | 1.0       | 0.1611 | -0.1546  | 0.7042   | 0.5360  |
| $\text{Li}_2\text{SiO}_3$   | O4   | 16 f             | 1.0       | 0.9172 | 0.4212   | 0.6831   | 0.5000* |
|                             | Si   | 4 a              | 1.0       | 0.0000 | 0.1823   | 0.4416   | 0.1200  |
|                             | Li   | 8 b              | 1.0       | 0.1718 | 0.3505   | -0.08323 | 0.1000* |
|                             | O1   | 8 b              | 1.0       | 0.1607 | 0.3070   | 0.4132   | 0.5348  |
|                             | O2   | 4 a              | 1.0       | 0.0000 | 0.1237   | 0.8549   | 1.000*  |

\* fixed for convergence

Fig. 1(a) in the main text is enlarged as Fig. S2 to clearly distinguish the reaction at the starting temperature. The temperature dependence of the reaction ratio of the  $\text{Li}_2\text{SiO}_3/\text{Li}_2\text{CO}_3$  mixture under various  $P(\text{CO}_2)$  values calculated from TG (black curves) and the differential of TG (DTG: red curves) are shown in Fig. S2. Further, the temperatures at which DTG curves deviate from 0.00, represented by arrows, are considered as reaction starting temperatures.

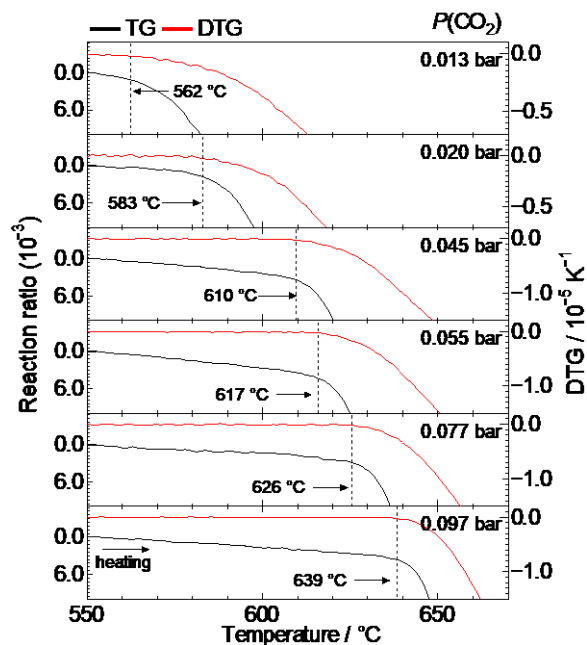

Fig. S2 Enlargement of Fig. 1(a). Temperature dependence of the reaction ratio of  $\text{Li}_2\text{SiO}_3/\text{Li}_2\text{CO}_3$  mixture under various  $P(\text{CO}_2)$  values calculated from TG (black curves) and differential of TG (DTG: red curves).

Fig. S3 shows the XRD pattern of CO<sub>2</sub>-absorbed Li<sub>3</sub>NaSiO<sub>4</sub> specimen at 650 °C under CO<sub>2</sub>/N<sub>2</sub> mixed gas with  $P(\text{CO}_2)$  of 0.10 bar after successive cooling under the same CO<sub>2</sub>/N<sub>2</sub> mixed gas. The XRD pattern indicated that the specimen was a mixture of Li<sub>2</sub>SiO<sub>3</sub> and LiNaCO<sub>3</sub>, indicating that reaction (2) occurred during the heat treatment.

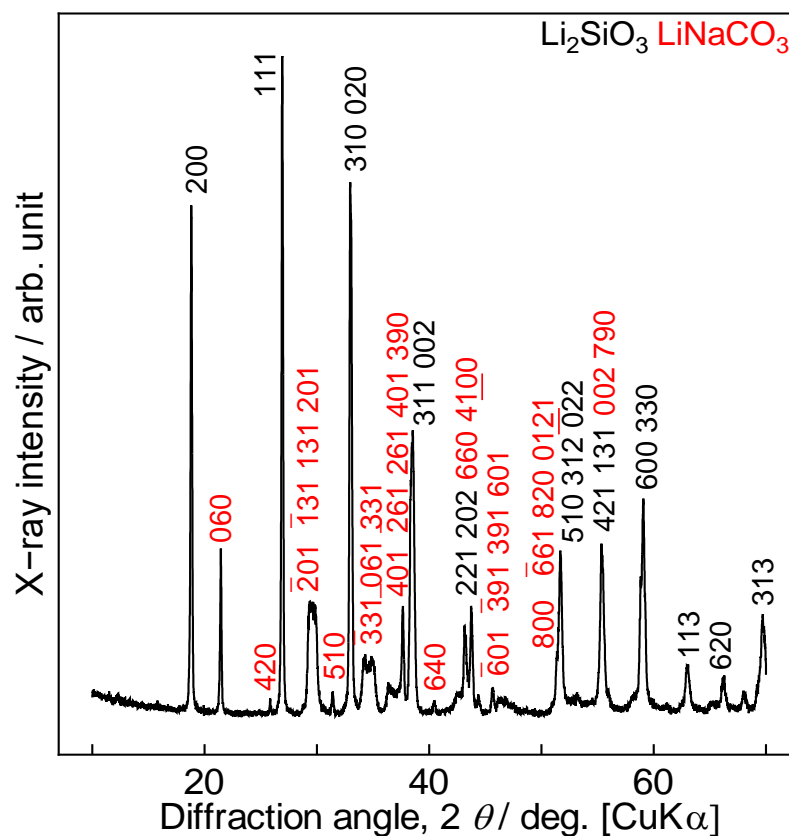

Fig. S3 XRD pattern of CO<sub>2</sub> absorbed Li<sub>3</sub>NaSiO<sub>4</sub> specimen at 650 °C under CO<sub>2</sub>/N<sub>2</sub> mixed gas with  $P(\text{CO}_2)$  of 0.10 bar after successive cooling. The black and red Miller index represent peaks identified as Li<sub>2</sub>SiO<sub>3</sub> (JCPDS No. 29-0829) and LiNaCO<sub>3</sub> (JCPDS No. 34-1193), respectively.

Fig. S4 shows SEM images of  $\text{Li}_2\text{SiO}_3$  prepared by (a) 1<sup>st</sup> and (b) 5<sup>th</sup>  $\text{CO}_2$  absorption at 650 °C in Fig. 4 and successive cooling in the  $\text{CO}_2/\text{N}_2$  mixed gas with  $P(\text{CO}_2)$  of 0.10 bar. Cogenerated  $\text{LiNaCO}_3$  was removed by the treatment of dilute  $\text{HNO}_3$ . Needle-like crystals with shorter edges of  $\sim 2 \mu\text{m}$  were observed in (a). Although an increase in size was observed, a large increase in size was not observed in (b).

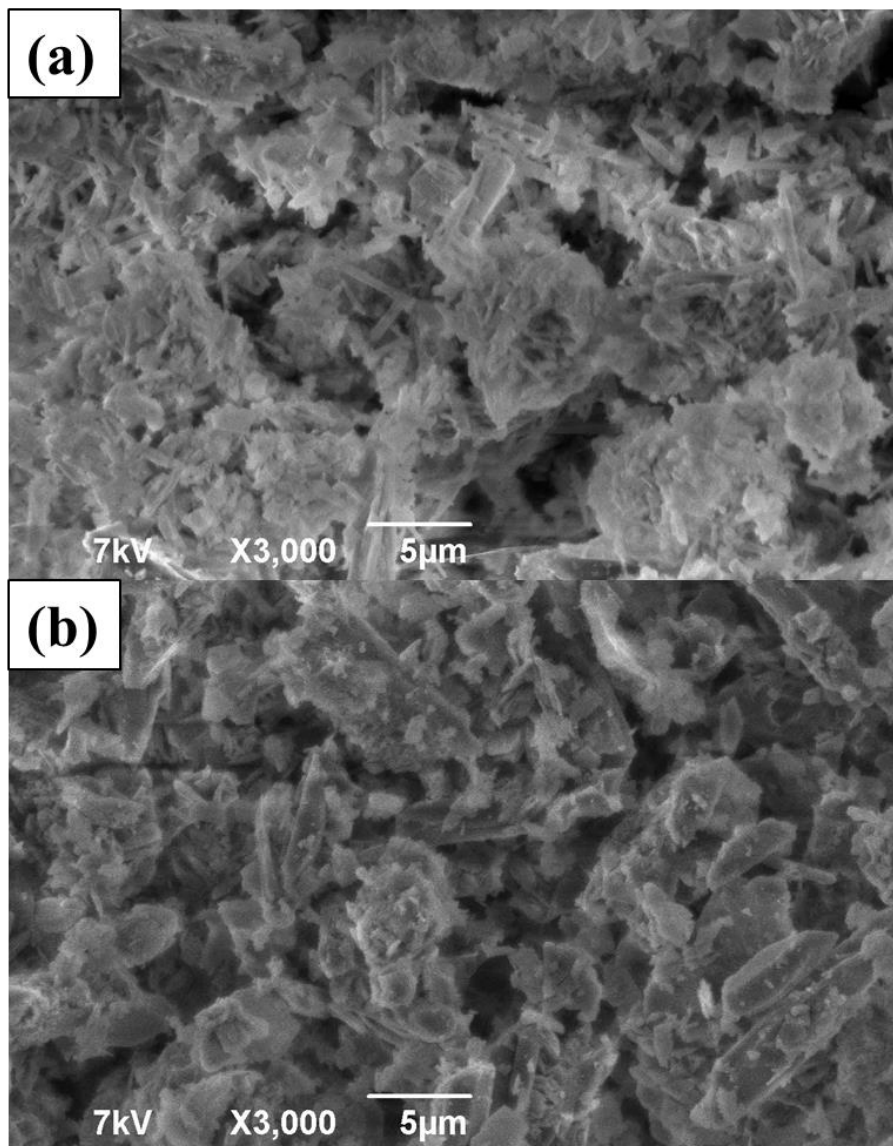

Fig. S4 SEM images of  $\text{Li}_2\text{SiO}_3$  prepared by (a) 1<sup>st</sup> and (b) 5<sup>th</sup>  $\text{CO}_2$  absorption at 650 °C in Fig. 4 and successive cooling in the  $\text{CO}_2/\text{N}_2$  mixed gas with  $P(\text{CO}_2)$  of 0.10 bar. Cogenerated  $\text{LiNaCO}_3$  was removed by immersing in dilute  $\text{HNO}_3$ .
